# Supplementary material for: Water Dynamics in Highly Concentrated Salt Solutions: A Multi‐Nuclear NMR Approach
Source: PubMed Central journal article supplement (PMC9156811; doi:10.1002/open.202200080), 2022-05-31
Supplement: OPEN-11-e202200080-s001.pdf [file OPEN-11-e202200080-s001.pdf]

# ChemistryOpen

Supporting Information

## **Water Dynamics in Highly Concentrated Salt Solutions: A Multi-Nuclear NMR Approach**

Nasrollah Rezaei-Ghaleh\*

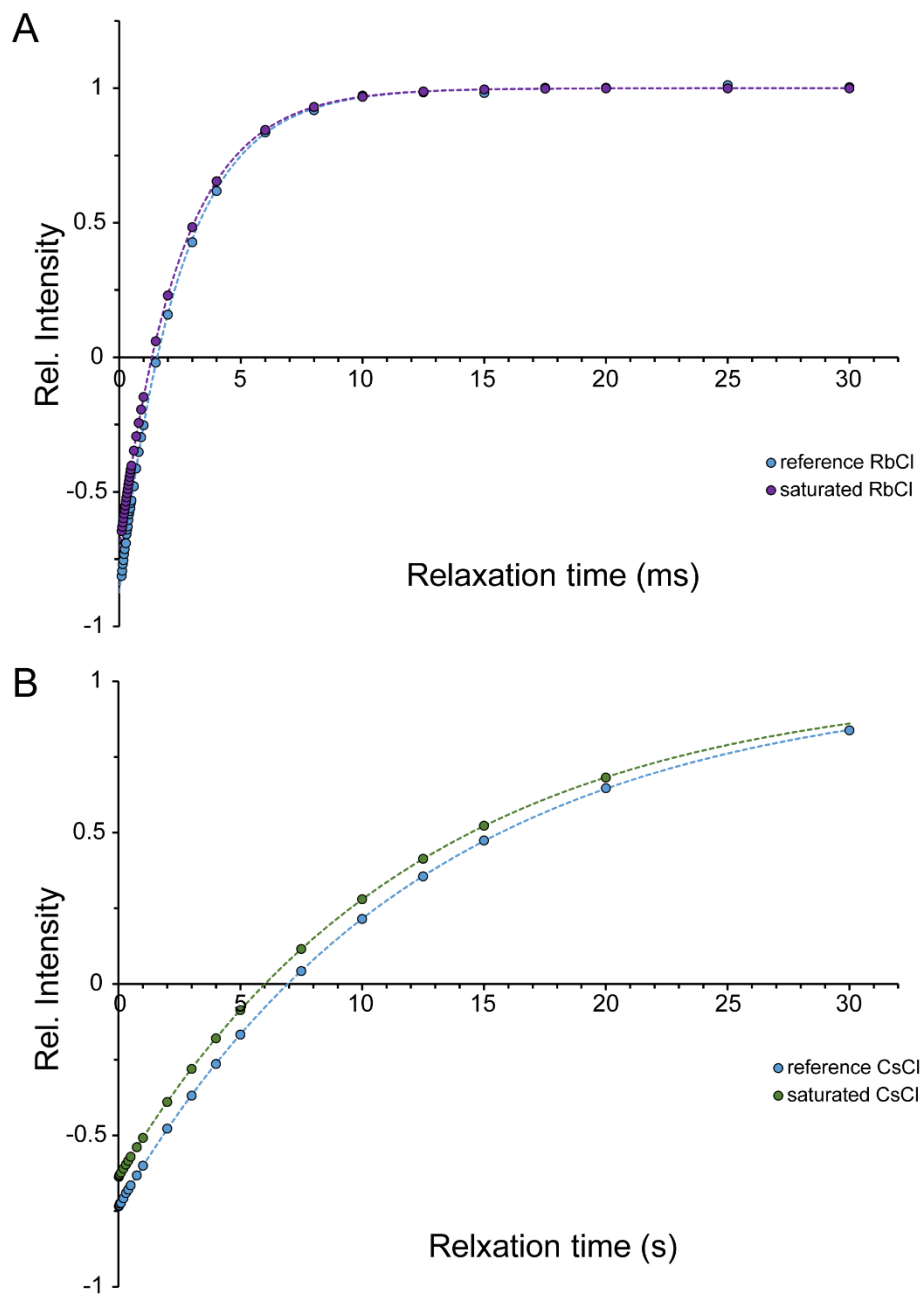

**Figure S1.**  $T_1$  relaxation time measurements of  $^{87}\text{Rb}$  and  $^{133}\text{Cs}$  cations in reference, i.e. dilute, and saturated RbCl and CsCl solutions, through inversion-recovery experiments.

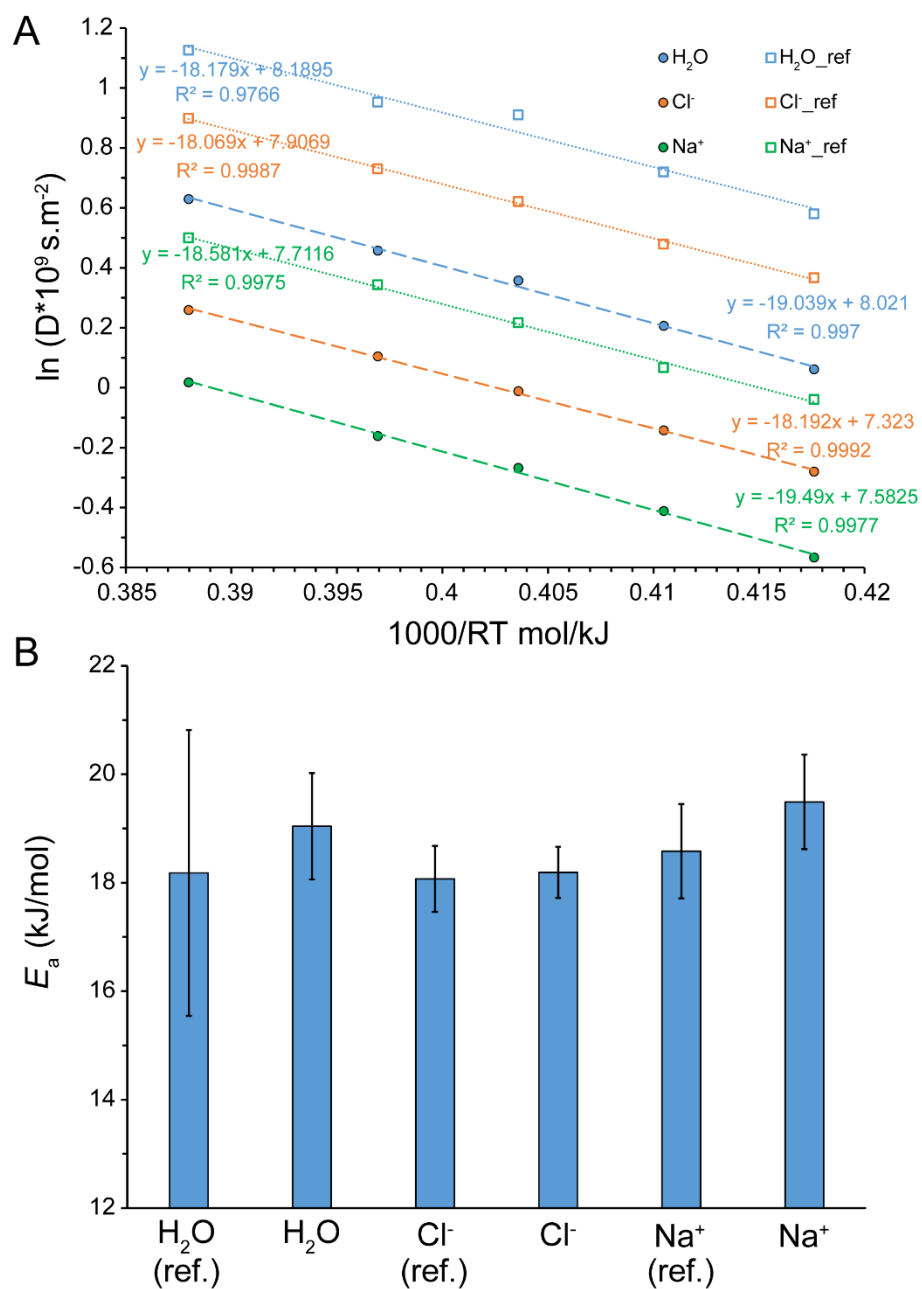

**Figure S2.** (A) Arrhenius analysis of temperature dependence of diffusion coefficients of water and chloride and sodium ions in reference (dilute) and saturated NaCl solutions. (B) Comparison of activation energies ( $E_a$ ) obtained for diffusion of water and chloride and sodium ions.

**Supporting Table S1.** Parameters of Pulsed Field Gradient (PFG)-NMR experiments used for the measurement of diffusion coefficients of water and ions in saturated (reference) alkali chloride solutions.

|       |                   | $\Delta$ in ms* | $\delta$ in ms* | No. of gradient points* | No. of NMR scans (NS)* | Recycle delay (d1+acq) in sec* |
|-------|-------------------|-----------------|-----------------|-------------------------|------------------------|--------------------------------|
| water | $^1\text{H}$      | 10              | 2               | 32                      | 16                     | 3                              |
|       | -                 | -               | -               | -                       | -                      | -                              |
|       | -                 | -               | -               | -                       | -                      | -                              |
| LiCl  | $^1\text{H}$      | 20              | 2               | 32                      | 16                     | 3                              |
|       | $^7\text{Li}$     | 50              | 9 (3)           | 16                      | 16 (32)                | 5.6                            |
|       | $^{35}\text{Cl}$  | 50              | 12              | 32 (16)                 | 128 (1k)               | 0.7                            |
| NaCl  | $^1\text{H}$      | 20              | 2               | 32                      | 16                     | 3                              |
|       | $^{23}\text{Na}$  | 50              | 5               | 16                      | 128                    | 1                              |
|       | $^{35}\text{Cl}$  | 50              | 12              | 32 (16)                 | 512                    | 0.7                            |
| KCl   | $^1\text{H}$      | 20              | 2               | 32                      | 16                     | 3                              |
|       | $^{39}\text{K}$   | -               | -               | -                       | -                      | -                              |
|       | $^{35}\text{Cl}$  | 50              | 12              | 32 (16)                 | 128 (1k)               | 0.7                            |
| RbCl  | $^1\text{H}$      | 20              | 2               | 32                      | 16                     | 3                              |
|       | $^{87}\text{Rb}$  | -               | -               | -                       | -                      | -                              |
|       | $^{35}\text{Cl}$  | 50              | 12              | 32 (16)                 | 512 (1k)               | 0.7                            |
| CsCl  | $^1\text{H}$      | 20              | 2               | 32                      | 16                     | 3                              |
|       | $^{133}\text{Cs}$ | 50              | 8               | 16                      | 16 (48)                | 3.8                            |
|       | $^{35}\text{Cl}$  | 20 (50)         | 16 (12)         | 16                      | 256 (1k)               | 0.7                            |

\*. If the values used in reference experiments were different from those of main experiments, they are shown in parentheses.

**Supporting Table S2.** Parameters of inversion-recovery experiments used for the measurement of  $^{17}\text{O}$ ,  $^7\text{Li}$ ,  $^{23}\text{Na}$ ,  $^{35}\text{Cl}$ ,  $^{87}\text{Rb}$  and  $^{133}\text{Cs}$   $T_1$  in saturated (reference) alkali chloride solutions.

|       |                   | Range of relaxation delays in ms | No. of relaxation datapoints * | No. of NMR scans (NS) * | Recycle delay (d1+acq) in sec* |
|-------|-------------------|----------------------------------|--------------------------------|-------------------------|--------------------------------|
| water | $^{17}\text{O}$   | 0.25-30                          | 21                             | 2560                    | 0.7                            |
|       | -                 | -                                | -                              | -                       | -                              |
|       | -                 | -                                | -                              | -                       | -                              |
| LiCl  | $^{17}\text{O}$   | 0.1-30<br>(0.25-30)              | 35<br>(21)                     | 3072<br>(2560)          | 0.7                            |
|       | $^7\text{Li}$     | 50-50000                         | 14                             | 8                       | 63                             |
|       | $^{35}\text{Cl}$  | 0.1-200                          | 38                             | 128                     | 0.5                            |
| NaCl  | $^{17}\text{O}$   | 0.25-30                          | 21                             | 2560                    | 0.7                            |
|       | $^{23}\text{Na}$  | 0.25-200<br>(0.25-500)           | 26 (27)                        | 64                      | 1.3                            |
|       | $^{35}\text{Cl}$  | 0.25-200                         | 26                             | 128                     | 0.7                            |
| KCl   | $^{17}\text{O}$   | 0.25-30                          | 21                             | 3072<br>(2560)          | 0.7                            |
|       | $^{39}\text{K}$   | -                                | -                              | -                       | -                              |
|       | $^{35}\text{Cl}$  | 0.25-200                         | 26                             | 64 (256)                | 0.7                            |
| RbCl  | $^{17}\text{O}$   | 0.25-30                          | 21                             | 3072<br>(2816)          | 0.7                            |
|       | $^{87}\text{Rb}$  | 0.1-30                           | 35                             | 64 (128)                | 0.6                            |
|       | $^{35}\text{Cl}$  | 0.25-200                         | 26                             | 128 (256)               | 0.7                            |
| CsCl  | $^{17}\text{O}$   | 0.25-30                          | 21                             | 3072<br>(2176)          | 0.7                            |
|       | $^{133}\text{Cs}$ | 10-20000                         | 19                             | 8                       | 21                             |
|       | $^{35}\text{Cl}$  | 0.25-200                         | 26                             | 128 (256)               | 0.7                            |

\*. If the values used in reference experiments were different from those of main experiments, they are shown in parentheses.

**Supporting Table S3.** Parameters of saturation-recovery experiments used for the measurement of  $^1\text{H}$   $T_1$  in saturated and reference alkali chloride solutions.

|       |              | Range of relaxation delays in sec | No. of relaxation datapoints * | No. of NMR scans (NS) * | $d_1$ in sec* |
|-------|--------------|-----------------------------------|--------------------------------|-------------------------|---------------|
| water | $^1\text{H}$ | 0.005-15                          | 17                             | 8                       | 30            |
| LiCl  | $^1\text{H}$ | 0.005-15                          | 17                             | 8                       | 30            |
| NaCl  | $^1\text{H}$ | 0.005-15                          | 17                             | 8                       | 30            |
| KCl   | $^1\text{H}$ | 0.005-15                          | 17                             | 8                       | 30            |
| RbCl  | $^1\text{H}$ | 0.005-15                          | 17                             | 8                       | 30            |
| CsCl  | $^1\text{H}$ | 0.005-15                          | 17                             | 8                       | 30            |
